# Supplementary material for: Selenium Toxicity to Honey Bee (Apis mellifera L.) Pollinators: Effects on Behaviors and Survival
Source: PLoS One. 2012 Apr 13;7(4):e34137. doi: 10.1371/journal.pone.0034137 (PMC3325990; doi:10.1371/journal.pone.0034137)
Supplement: Table S1 — Honey bee sucrose response thresholds after selenium feeding treatments. (XLS) [file pone.0034137.s001.xls]

## Sheet: Sheet1
Table 1. Honey bee sucrose response thresholds after selenium feeding treatments.
Percentages of bees responding to antennal stimulation with 6 concentrations of sucrose after treatment with selenate, selenomethionine, or methionine.
				% Sucrose concentration (antennal treatment)
	Feeding treatment concentration (µg ml-1)	N		0.1		0.3		1		3		10		30			Average % of non-responsive bees			Average % response to water
Selenate	0	36		22 ± 7		28 ± 8		31 ± 8		47 ± 8		78 ± 7	***	75 ± 7	***			52			26 ± 3
	0.6	34		18 ± 7		21 ± 7		24 ± 7		29 ± 8	*	35 ± 8	**	47 ± 9	**			71			14 ± 2
	6	31		23 ± 8		23 ± 8		26 ± 8		29 ± 8	*	35 ± 9	**	48 ± 9	**			69			15 ± 3
	60	28		29 ± 9		32 ± 9		32 ± 9		39 ± 9		46 ± 10		46 ± 10				63			35 ± 4
	600	31		13 ± 6		13 ± 6		16 ± 7		16 ± 7		35 ± 9	**	39 ± 9	**			78			10 ± 2
	6000	32		13 ± 6		9 ± 5		9 ± 5		16 ± 7		25 ± 8	*	31 ± 8	**			83			8 ± 2
Selenomethionine	0	19		16 ± 9		16 ± 9		16 ± 9		47 ± 12	*	42 ± 12	*	79 ± 10	***			64			11 ± 3
	0.6	20		5 ± 5		10 ± 7		10 ± 7		15 ± 8		25 ± 10		40 ± 11	*			82			9 ± 3
	6	18		22 ± 10		33 ± 11		33 ± 11		28 ± 11		44 ± 12		50 ± 12	*			65			23 ± 4
	60	19		16 ± 9		11 ± 7		11 ± 7		32 ± 11	*	26 ± 10		58 ± 12	**			75			17 ± 4
	600	20		30 ± 11		35 ± 11		20 ± 9		30 ± 11		50 ± 11	**	40 ± 11				66			19 ± 4
	6000	20		30 ± 11		20 ± 9		15 ± 8		20 ± 9		35 ± 11	*	35 ± 11	*			74			15 ± 3
Methionine	0	20		20 ± 9		15 ± 8		10 ± 7		50 ± 11	*	50 ± 11	**	75 ± 10	***			63			13 ± 3
	0.6	20		5 ± 5		5 ± 5		5 ± 5		25 ± 10		30 ± 11	*	55 ± 11	**			79			8 ± 3
	6	20		10 ± 7		15 ± 8		20 ± 9		30 ± 11		45 ± 11	**	50 ± 11	**			72			8 ± 3
	60	20		5 ± 5		5 ± 5		5 ± 5		15 ± 8		25 ± 10	*	55 ± 11	**			82			7 ± 2
	600	20		30 ± 11		25 ± 11		30 ± 11	*	40 ± 11	*	45 ± 11	**	60 ± 11	**			62			16 ± 3
	6000	19		5 ± 5		16 ± 9		21 ± 10		37 ± 11	*	37 ± 11	*	53 ± 12	**			72			11 ± 3
Asterisks indicate significance of *P < 0.05, **P < 0.001, ***P < 0.0001 (Logistic regression with multiple comparisons) between antennal stimulation with water and increasing sucrose concentrations
